# Supplementary material for: Influence of convection on the upper tropospheric O 3 and NO x budget in southeastern China
Source: Copernicus journal article supplement (doi:10.5194/acp-2021-650), 2021-11-17
Supplement: Supplementary file 2 [file acp-2021-650-supplement.pdf]

# Supporting Information for "Influence of convection on the upper tropospheric O<sub>3</sub> and NO<sub>x</sub> budget in southeastern China"

Xin Zhang<sup>1,2</sup>, Yan Yin<sup>1,2</sup>, Ronald van der A<sup>2,3</sup>, Henk Eskes<sup>3</sup>, Jos Van Geffen<sup>3</sup>, Yunyao Li<sup>4</sup>, Xiang Kuang<sup>1,2</sup>, Jeff L. Lapierre<sup>5</sup>, Kui Chen<sup>1,2</sup>, Zhongxiu Zhen<sup>1,2</sup>, Jianlin Hu<sup>1,2</sup>, Chuan He<sup>1,2</sup>, Jinghua Chen<sup>1,2</sup>, Rulin Shi<sup>6</sup>, Jun Zhang<sup>7</sup>, Xingrong Ye<sup>7</sup>, and Hao Chen<sup>7</sup>

<sup>1</sup> Collaborative Innovation Center on Forecast and Evaluation of Meteorological Disasters/Key Laboratory for Aerosol-Cloud-Precipitation of China Meteorological Administration, Nanjing University of Information Science and Technology (NUIST), Nanjing 210044, China

<sup>2</sup> Department of Atmospheric Physics, Nanjing University of Information Science and Technology (NUIST), Nanjing 210044, China

<sup>3</sup> Royal Netherlands Meteorological Institute (KNMI), Department of Satellite Observations, De Bilt, the Netherlands

<sup>4</sup> Department of Atmospheric, Oceanic & Earth Sciences, George Mason University, Fairfax, VA, USA

<sup>5</sup> Earth Networks, Germantown, Maryland, USA

<sup>6</sup> Inner Mongolia Lightning Warning and Protection Center, Hohhot, 010051, China

<sup>7</sup> Nanjing National Reference Climatological Station, Nanjing 210044, China

**Correspondence:** Yan Yin (yinyan@nuist.edu.cn)

## Contents of this file

Figure S1. to S5.

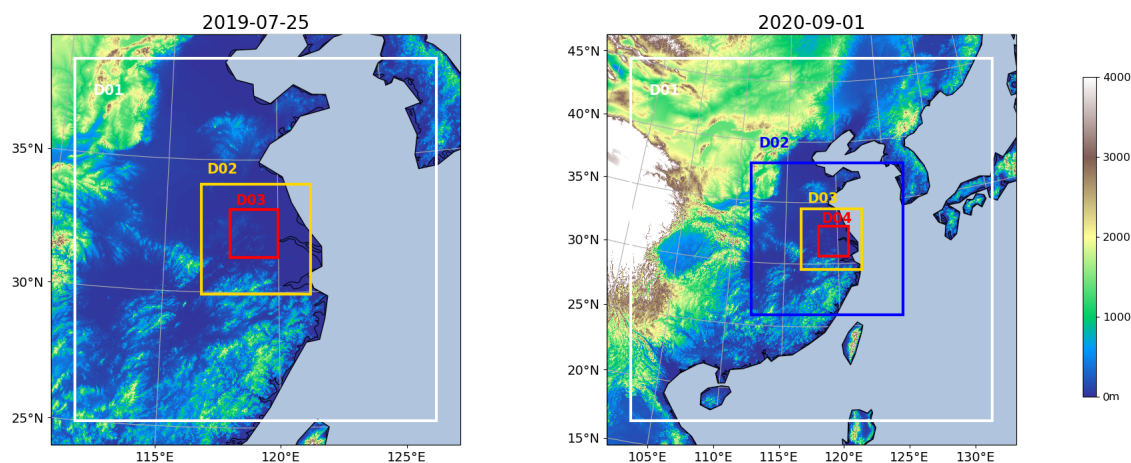

**Figure S1.** Domain and terrain height (m) of the WRF-Chem simulation for the 2019 and 2020 case. The horizontal grid resolution of domains for the 2019 case is 15 km (D01), 3 km (D02) and 0.6 km (D03). For the 2020 case, it is 27 km (D01), 9 km (D02), 3 km (D03), and 1 km (D04).

### WACCM Chemical Forecast

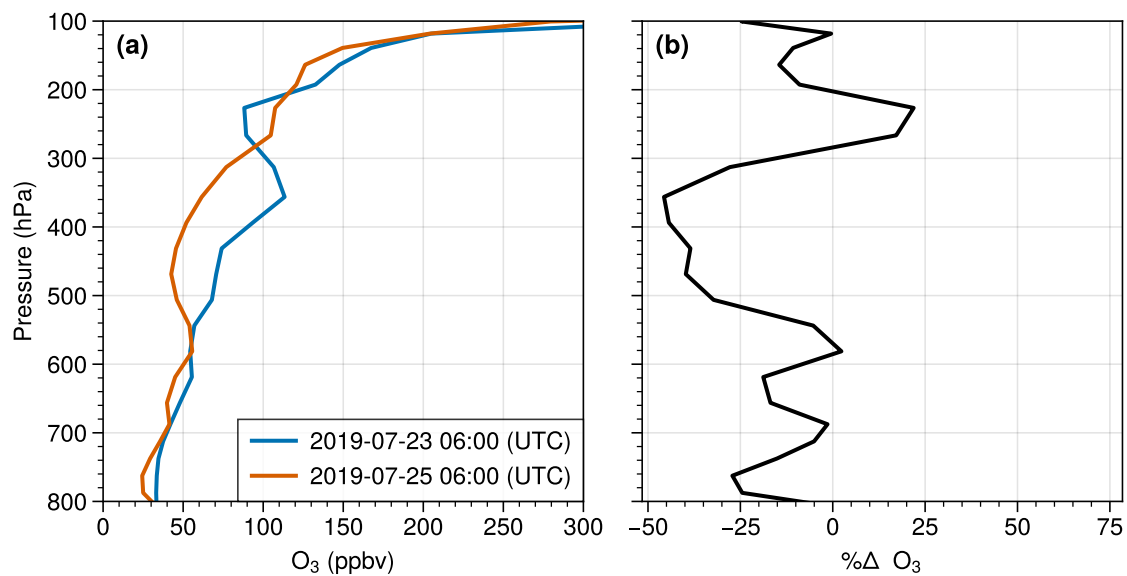

**Figure S2.** (a) Regional mean ( $118.5^\circ\text{E} - 119.5^\circ\text{E}$ ,  $31.5^\circ\text{N} - 32.5^\circ\text{N}$ ) preconvective (blue) and postconvective (orange)  $O_3$  profiles from the WACCM forecasts. (b) The percent difference of  $O_3$  profiles in (a).

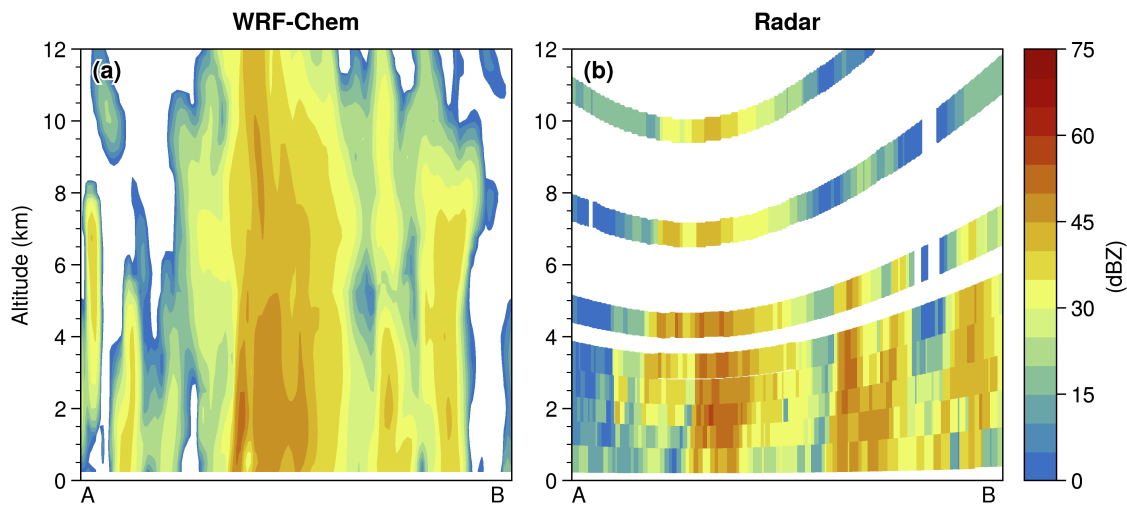

**Figure S3.** Vertical cross sections of (a) WRF-Chem simulated and (b) observed radar reflectivity fields along the transect lines (AB) in Fig. 2.

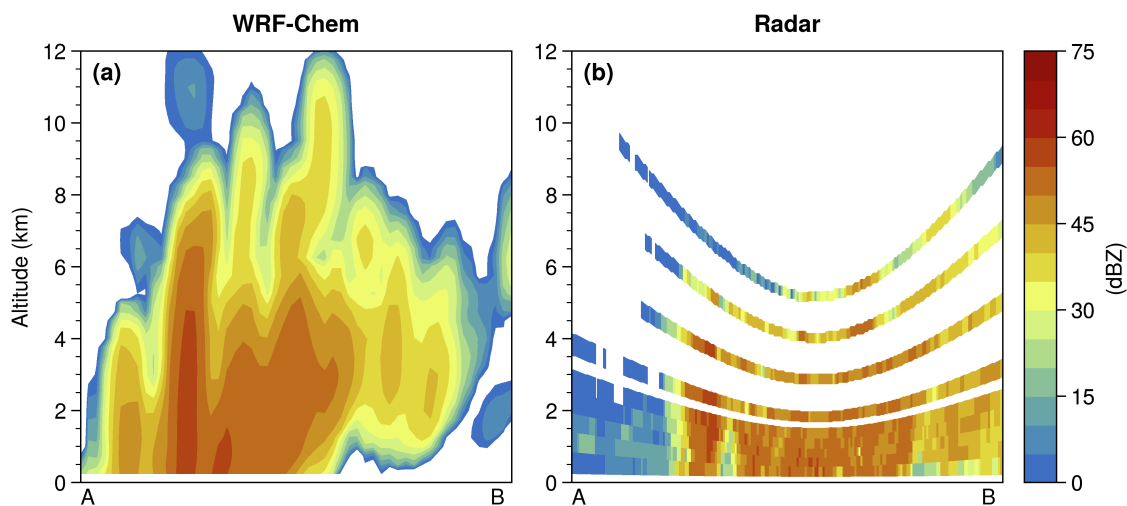

**Figure S4.** Same as Figure S3 but for the case on 01 September 2020.

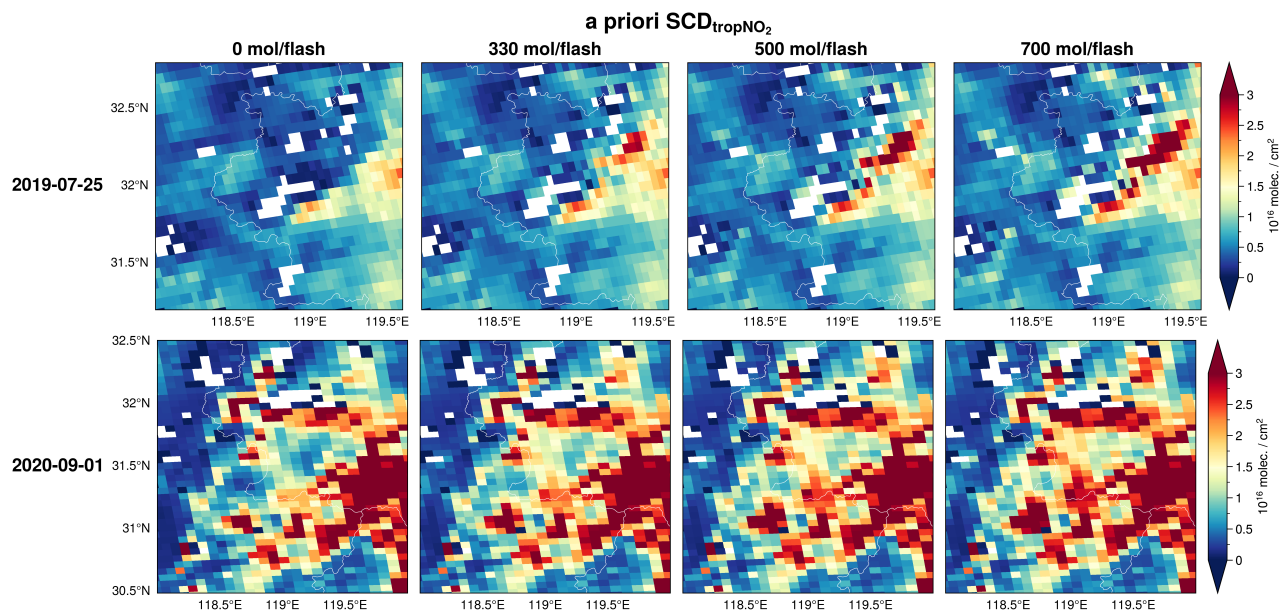

**Figure S5.** The tropospheric  $\text{NO}_2$  slant column density ( $\text{SCD}_{\text{tropNO}_2}$ ) recalculated using the WRF-Chem results with different lightning NO settings: (a) 0 mol/flash, (b) 330 mol/flash, (c) 500 mol/flash and (d) 700 mol/flash.
