# Supplementary material for: Influence of convection on the upper tropospheric O 3 and NO x budget in southeastern China
Source: Copernicus journal article supplement (doi:10.5194/acp-2021-650), 2021-11-17
Supplement: Supplementary file [file acp-2021-650-AC2-supplement.pdf]

# **Influence of convection on the upper tropospheric $\text{O}_3$ and $\text{NO}_x$ budget in southeastern China**

## **Response to Anonymous Referee #3**

Xin Zhang, Yan Yin, Ronald van der A, Henk Eskes, Jos van Geffen, Yunyao Li, Xiang Kuang,  
Jeff L. Lapierre, Kui Chen, Zhongxiu Zhen, Jianlin Hu, Chuan He, Jinghua Chen, Rulin Shi,  
Jun Zhang, Xingrong Ye, and Hao Chen

February 4, 2022

We thank the reviewer for his/her positive comments and very careful reading of our article. The individual corrections suggested are addressed below. The reviewer's comments will be shown in **red**, our response in **blue**, and changes made to the paper are shown in **black** block quotes. Unless otherwise indicated, page and line numbers correspond to the original manuscript. Figures, tables, or equations referenced as " $R_n$ " are numbered within this response; if these are used in the changes to the paper, they will be replaced with the proper number in the revised version.

## General Comments

(1) Since  $\text{LNO}_x$  is a key component of this study, affecting both  $\text{O}_3$  chemistry and  $\text{NO}_2$  and  $\text{LNO}_x$  air mass factors, it would be helpful to show several examples of WRF-Chem vertical profiles of these constituents for the two cases under different PE assumptions near and downwind of convection. For example,  $\text{NO}_2$ ,  $\text{LNO}_2$  and  $\text{LNO}_x$  profiles could be discussed in the context of the  $\text{O}_3$  profiles of Fig. 4 and the  $\Delta\text{AMFs}$  of Fig. 6. If feasible, it also would be interesting to compare the profiles with the standard profiles from TM5 used in the TROPOMI data product to illustrate the importance of local effects.

Thanks for your suggestions. We have added another short section to discuss the effects of  $\text{LNO}_x$  on  $\text{O}_3$  profile using integrated reaction rate (IRR) results. Beside, the TM5,  $\text{NO}_2$ ,  $\text{LNO}_2$  and  $\text{LNO}_x$  profiles are also added to the supplement.

### Impact of lightning $\text{NO}_x$ on the $\text{O}_3$ profile

Furthermore, the IPR outputs including LNO emission are compared with these excluding LNO to explore the effects of  $\text{LNO}_x$  on  $\text{O}_3$  (Table R1). The  $\text{LNO}_x$  reduces the net  $\text{O}_3$  production by 25 % and 40 % during the convective period and life cycle of the 2019 case, respectively. The decreased chemistry contribution is less significant ( $\leq 1\%$ ) for the 2020 case which has a smaller lightning density near the station. Note that the  $\text{LNO}_x$  can certainly enhance the downwind ozone production on the scale of days (Pickering et al., 1996; DeCaria et al., 2005). Therefore, it is necessary to estimate the  $\text{LNO}_x$  PE accurately (discussed later in Sect. 6.2).

**Table R1** . Process analysis table for the mean  $\text{O}_3$  integrated tendencies (10–14 km).

| Period            | Time          | LNO (mol/flash) | advh + advz*     | chem*          | net*  |
|-------------------|---------------|-----------------|------------------|----------------|-------|
| Life Cycle        | 2019-07-25    | 0               | -3.3 (-24.6 %)   | 16.7 (124.6 %) | 13.4  |
|                   | (03:20–05:40) | 500             | -2.3 (-28.8 %)   | 10.3 (128.8 %) | 8.0   |
|                   | 2020-09-01    | 0               | 3.4 (9.6 %)      | 32.0 (90.4 %)  | 35.4  |
|                   | (04:20–06:40) | 500             | 4.4 (12.1 %)     | 31.9 (87.8 %)  | 36.3  |
| Convective Period | 2019-07-25    | 0               | -19.6 (140.0 %)  | 5.6 (-40.0 %)  | -14.0 |
|                   | (04:20–05:00) | 500             | -20.0 (114.3 %)  | 2.5 (-14.3 %)  | -17.5 |
|                   | 2020-09-01    | 0               | -9.7 (-131.1 %)  | 17.1 (231.1 %) | 7.4   |
|                   | (05:40–06:20) | 500             | -10.1 (-148.5 %) | 16.9 (248.5 %) | 6.8   |

\*The unit is  $10^{10}$  molec.  $\text{cm}^{-3}$ . The percentage is the proportion of each part in the net  $\text{O}_3$  change.

Additionally, the convection was divided into three regions by TROPOMI data: fresh lightning , downwind of fresh lightning, and aged lightning (See Sect. 6.1 and Fig. R5 for details). Firstly, the difference of  $\text{O}_3$  ( $\Delta\text{O}_3$ ) profiles is obtained with different LNO PE assumption (Fig. R1a–c). In contrast with the net loss of ozone ( $< 4$  ppbv) over all height levels in Ott et al. (2007), the  $\Delta\text{O}_3$  is mostly positive ( $< 1$  ppbv) between 2 km and 5 km and negative ( $> -3$  ppbv) between 5 km and 12 km in our cases. The higher PE (700 mol/flash) slightly reduces the  $\text{O}_3$  concentration by less than 1 ppbv at all levels compared with the default PE (500 mol/flash) and it even leads to negative  $\Delta\text{O}_3$  between 2 km and 5 km downwind of fresh lightning (Fig. R1b). The maximum  $\text{O}_3$  loss is between 8 km and 10 km due to the peak of  $\text{LNO}_x$  (up to 2.6 ppbv) introduced in the model.

Then, the integrated reaction rate (IRR) is applied to determine the chemistry mechanism and the effect of LNO on the  $\text{O}_3$  variation for two layers where the  $\Delta\text{O}_3$  is opposite: 800 hPa–500 hPa ( $\Delta\text{O}_3 > 0$ ) and 500 hPa–200 hPa ( $\Delta\text{O}_3 < 0$ ). The tropospheric  $\text{O}_3$  is mainly controlled by five reaction rate terms (Pickering

et al., 1990; Bozem et al., 2014):

$$\begin{aligned} \frac{d}{dt}[\text{O}_3] = & k_1[\text{NO}][\text{HO}_2] + \sum_i k_i[\text{NO}][\text{R}_i\text{O}_2] \\ & - k_3[\text{H}_2\text{O}][\text{O}(^1\text{D})] - k_4[\text{HO}_2][\text{O}_3] - k_5[\text{OH}][\text{O}_3] \end{aligned} \quad (\text{R1})$$

where  $k_i$  is the rate coefficient of the reaction between peroxy radicals ( $\text{R}_i\text{O}_2$ ) and NO. The time series of each contribution to  $\text{O}_3$  production are illustrated in Fig. R1d–i. Overall, the time series of IRR are more variable for the 2019 case due to the stronger activity as clarified in Sect. 4. The total net chemistry production of  $\text{O}_3$  keeps positive for both layers. In detail, the reaction between NO and  $\text{HO}_2$  always dominates the production while the oxidation of NO by  $\text{RO}_2$  is about 40 %–60 % of that production. The dominant loss of  $\text{O}_3$  is the photolysis (described by the reaction of  $\text{O}(^1\text{D})$  and  $\text{H}_2\text{O}$ ) while the reaction between  $\text{O}_3$  and OH is comparable during the convective period. The lowest contribution to  $\text{O}_3$  loss,  $\text{O}_3 + \text{HO}_2 \rightarrow \text{OH} + 2\text{O}_2$ , is reduced during the convection because of the production of  $\text{LNO}_x$ , which captures the  $\text{HO}_2$  reacting with  $\text{O}_3$ . Note that although the increase of total IRR induced by  $\text{LNO}_x$  can reach  $1.36 \times 10^7 \text{ molec. cm}^{-3} \text{ s}^{-1}$  and  $2.60 \times 10^6 \text{ molec. cm}^{-3} \text{ s}^{-1}$  in the low layer and high layer over these three regions, respectively, the net  $\text{O}_3$  production actually decreases in the high layers (Fig. R1a–c) due to the combination of dynamic transport and chemical production related to  $\text{LNO}_x$ .

#### Relation between lightning and TROPOMI products

... Figure R4 shows that the AMF changes are mostly controlled by the  $\text{LNO}_x$  in the UT layer where the detection sensitivity is high (Beirle et al., 2009; Laughner and Cohen, 2017) and the  $\text{LNO}_x$  production reaches the peak (Fig. R2) ...

... The clouds are higher than 400 hPa ( $p_{\text{cloud}} < 400 \text{ hPa}$ ) and  $f_{\text{effNO}_2}$  is larger than 0.6 over fresh lightning pixels, but both aged lightning and downwind of fresh lightning areas have clouds lower than 400 hPa. This coincides with the mean cloud pressures in Fig. R2 and explains why  $\text{UT } \Delta\text{AMF}_{\text{trop}} > 20 \%$  exits in Fig. R4b<sub>i</sub> and b<sub>iii</sub>, indicating the possibility of  $\text{LNO}_x$  estimations over the aged lightning regions (Sect. 6.2). ...

... Besides, considering the region-specific  $\text{LNO}_x$  effects on AMFs, we need to include the representation of  $\text{LNO}_2$  in the TROPOMI  $\text{NO}_2$  retrievals better, especially outflow regions. The comparisons (Fig. R2) between the TROPOMI standard  $\text{NO}_2$  profiles from TM5-MP and WRF-Chem also illustrate the importance of  $\text{LNO}_x$ , resolved convection transport, and emissions. Aircraft observations of NO and  $\text{NO}_2$  will be useful to determine the exact roles (Laughner and Cohen, 2017).

(2) I find that giving the contributions of dynamic and chemical effects on  $\text{O}_3$  as percentages is confusing (abstract, text and conclusions) when the percentages are greater than 100 and the effects have opposite signs. For example, to summarize the life cycles of both cases, it would be clearer to say that the chemistry increases  $\text{O}_3$  in both cases and that the magnitude of the effect is 5–10 times the magnitude of dynamic effects (rather than using the > 87% figure).

Yes, the percentage changes are confusing. We have modified them according to your advice.

#### Abstract

... During the whole convection life cycle, the UT  $\text{O}_3$  production is driven by the chemistry (5–10 times the magnitude of dynamic contribution) and reduced by the  $\text{LNO}_x$  (–40 %).

#### Convection impacts

... While the dynamic processes play an important role in the  $\text{O}_3$  production, the positive chemistry contribution cannot be neglected in both cases and leads to the net increase in UT  $\text{O}_3$  during the convective period of 2020 case. Specifically, the chemistry increases  $\text{O}_3$  in both cases and the magnitude of the effect is 5–10 times that of dynamic effects. This demonstrates the dominant chemistry role in the overall effects of convection.

#### Conclusions

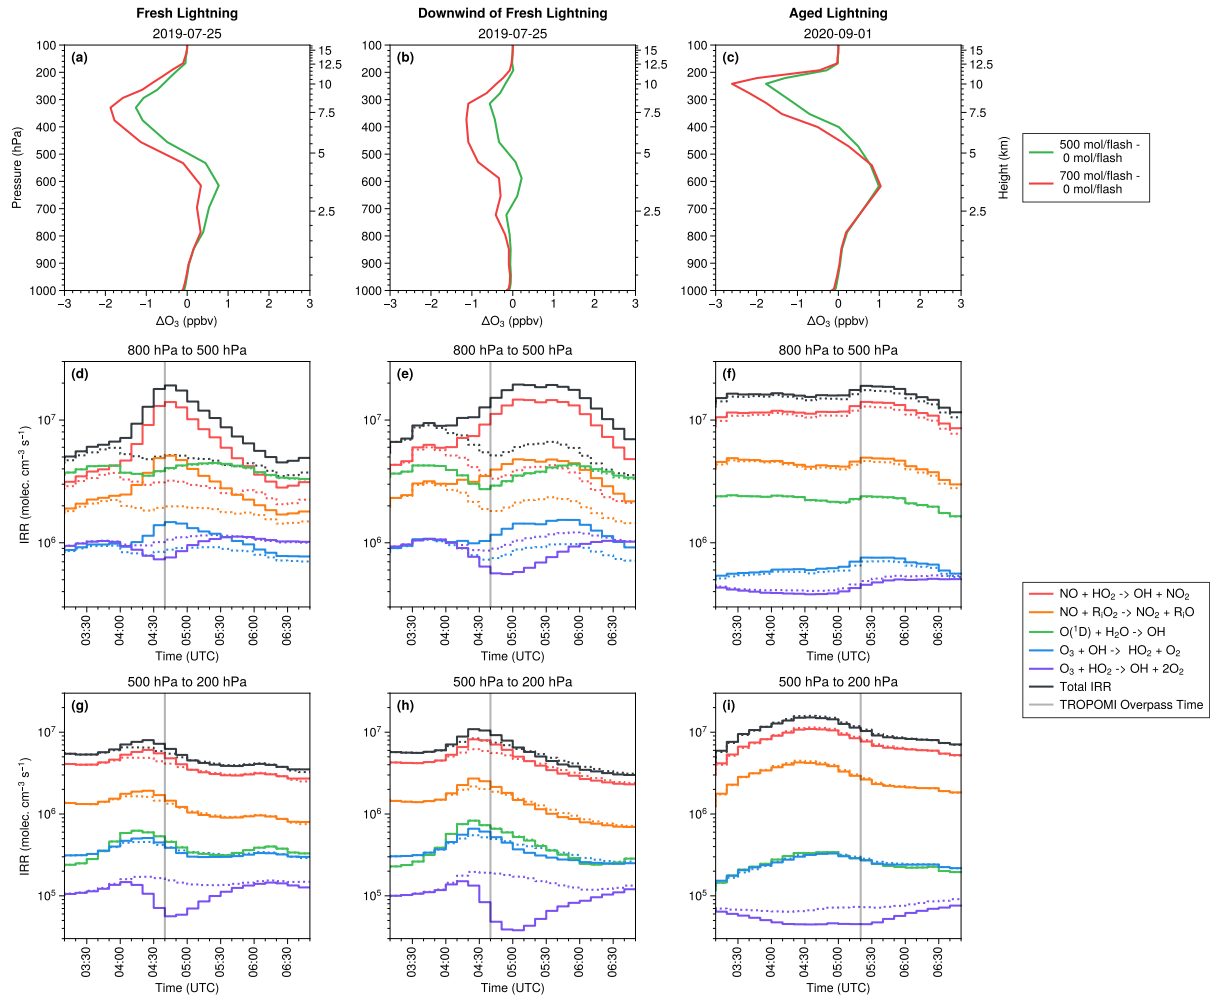

**Figure R1 .** (a–c) Changes in  $O_3$  profiles due to  $LNO_x$  at TROPOMI overpass time in three regions (fresh lightning region, downwind of fresh lightning, and aged lightning area) as defined in Fig. 7. (d–f) Time series of the mean integrated reaction rate (IRR) between 800 hPa and 500 hPa. The legend shows detailed species and reactions. The Total IRR is the  $O_3$  loss IRR subtracted from the  $O_3$  production IRR (red and orange lines). The solid line shows the IRR with LNO (500 mol/flash) while the dashed line is without LNO. (g–i) Same as (d–f) but between 500 hPa and 200 hPa.

... The detailed analysis of integrated physical rates shows that the dynamic processes dominate the UT  $O_3$  decrease during the convective stage of both cases. However, in the convection life cycle, the contribution of chemistry reactions to the UT  $O_3$  production is 5–10 times that of dynamics.

(3) A substantial part of UT  $NO_2$  seen in the 2020 event is likely not produced by the flashes counted in the region in the hour(s) immediately prior to overpass. As seen in Fig. 5a, b, increased  $SCD_{tropNO_2}$  is visible in regions where the cloud pressures are higher and cloud fractions are lower. This is mentioned in lines 210 – 215 on page 12 (the relevance of Fig. S5 to this should also be made clearer). Some estimate of ambient  $NO_2$  is needed so that it can be subtracted as a tropospheric background before the  $LNO_x$  is computed. Studies have shown backgrounds can be substantial (e.g. Allen et al. 2019; Bucsela et al. 2019). A related issue is the relatively small estimate of 10% for the error introduced by the stratosphere (Allen et al.,



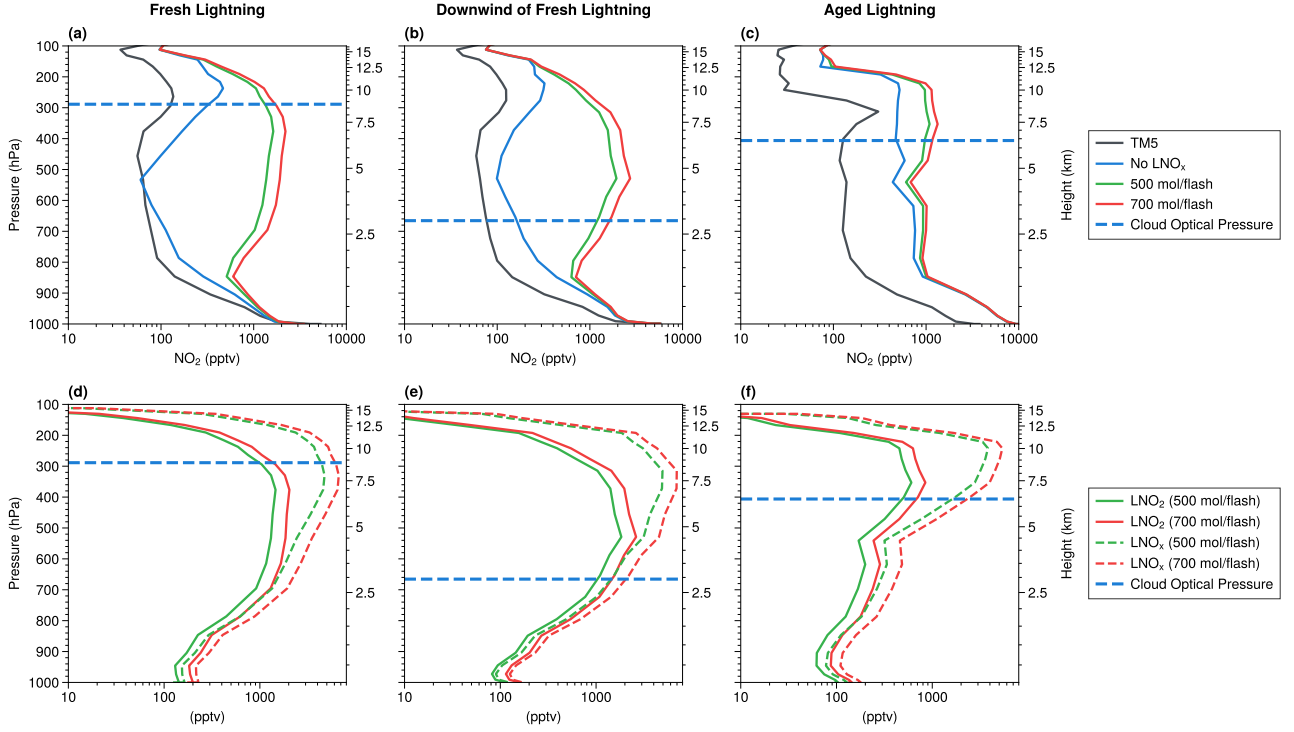

**Figure R2 .** Profiles with different lightning NO productions at TROPOMI overpass time over three regions (fresh lightning, downwind of fresh lightning, and aged lightning). (a–c) The NO<sub>2</sub> profiles compared with the official TM5 a priori NO<sub>2</sub> profile. (d–f) The lightning NO<sub>2</sub> and NO<sub>x</sub> profiles. The blue dashed line is the cloud optical pressure detected by TROPOMI.

2019 - not 2021). This error assumed a tropospheric background subtraction that partially cancels stratospheric errors. Without this subtraction, the error would be larger.

1. Thanks, we have clarified the relevance of these figures for the ambient NO<sub>2</sub>.
2. Note that the ambient NO<sub>2</sub> has been considered in the numerator of AMF<sub>LNO<sub>x</sub></sub>:

$$AMF_{LNO_x} = \frac{(1 - f_{effNO_2}) \int_{p_{surf}}^{p_{tp}} w_{clear}(p) NO_2(p) dp + f_{effNO_2} \int_{p_{cloud}}^{p_{tp}} w_{cloudy}(p) NO_2(p) dp}{\int_{p_{surf}}^{p_{tp}} LNO_x(p) dp} \quad (R2)$$

This is different from that of Pickering et al. (2016), Allen et al. (2019), and Bucsel et al. (2019). We have added the comparison in Sect. 2.3 (TROPOMI Data).

3. For the stratospheric errors, we have estimated the uncertainty as 9 % by applying a bias of  $\pm 10^{14}$  molec. cm<sup>2</sup> (van Geffen et al., 2021). As mentioned in Bucsel et al. (2019), if they do not consider the background subtraction, "the stratospheric bias would have a >90 % effect on PE". Therefore, the low uncertainty (9 %) related to the stratospheric vertical column indicates that our AMF<sub>LNO<sub>x</sub></sub> works well.

### Relation between lightning and TROPOMI products

... Either the inadequate flash or weak convection could lead to a smaller SCD<sub>tropNO<sub>2</sub></sub> over pixels with  $f_{effNO_2} \approx 1$  because the TROPOMI can only see the LNO<sub>2</sub> above the clouds. In other words, the polluted NO<sub>2</sub> below the broken or thinner clouds is partially exposed if  $f_{effNO_2} < 1$ . The sensitivity tests of

the WRF-Chem a priori  $\text{SCD}_{\text{tropNO}_2}$  can help explain this phenomenon clearly (Fig. S5). The pixels of high  $\text{SCD}_{\text{tropNO}_2}$  with low cloud fraction belong to background  $\text{NO}_2$  pollution (Fig. S5a and e), but the  $\text{SCD}_{\text{tropNO}_2}$  increased by UT  $\text{LNO}_2$  is still visible compared with the lower  $\text{SCD}_{\text{tropNO}_2}$  without  $\text{LNO}_2$  (Fig. S5b–d and f–h).

#### TROPOMI data

... In comparison with this study, Pickering et al. (2016), Allen et al. (2019), Bucsela et al. (2019), and Allen et al. (2021) defined another  $\text{AMF}_{\text{LNO}_x}$  to convert  $\text{SCD}_{\text{tropNO}_2}$  to the tropospheric  $\text{NO}_x$  vertical column density ( $\text{VCD}_{\text{NO}_x}$ ). Then, their  $\text{VCD}_{\text{LNO}_x}$  can be calculated as 1) the slope of the regression between  $\text{VCD}_{\text{NO}_x}$  and flashes or 2) the  $\text{VCD}_{\text{NO}_x}$  subtracted by a tropospheric  $\text{NO}_x$  background. Because our  $\text{AMF}_{\text{LNO}_x}$  converts the  $\text{SCD}_{\text{tropNO}_2}$  to  $\text{VCD}_{\text{LNO}_x}$  directly, the additional estimation of background  $\text{NO}_2$  is not needed for calculating  $\text{LNO}_x$  PE in Sect. 6.2.

#### Estimations of $\text{LNO}_x$

... Following Allen et al. (2019) and Zhang et al. (2020), the uncertainty of  $\text{LNO}_x$  is determined by  $\text{LNO}_x$  lifetime, lightning DE,  $\text{NO}/\text{NO}_2$  ratio,  $\text{LNO}$  profile, and other sources (summarized in Table R2). The lifetime ( $\tau$ ) of  $\text{NO}_2$  is replaced by 2 and 6 hours to evaluate the uncertainty as 27 % while another uncertainty is also 27 % related to lightning DE by changing the ratio of IC to CG to 2:1 and 4:1. The uncertainty caused by modeled  $\text{NO}/\text{NO}_2$  ratios is assumed to be 30 % based on Allen et al. (2019) and the uncertainty related to  $\text{LNO}$  profile is 26 % by using the a priori  $\text{NO}_2$  profile with 330 and 700 mol  $\text{NO}$  per flash. The uncertainty associated with the stratospheric vertical column is considered as 7 % by applying a bias of  $\pm 10^{14}$  molec.  $\text{cm}^2$  (van Geffen et al., 2021). The uncertainty caused by other possible error sources including systematic errors in slant columns, optical cloud pressure, and  $\text{NO}_2$  redistributed by convection is difficult to quantify and assumed as 10 % following Allen et al. (2021). Assuming no correlation between errors, the total uncertainty (56 %) is estimated as the square root of the sum of the squares of all individual uncertainties. As a result, the  $\text{LNO}_x$  PE is  $60 \pm 33$  mol  $\text{NO}_x$  per flash. It is less than that of our previous work ( $90 \pm 50$  mol  $\text{NO}_x$  per flash) over the continental United States (Zhang et al., 2020) and at the lower end of  $120 \pm 65$  mol  $\text{NO}_x$  per flash obtained in Allen et al. (2021). Thus, more studies over China are necessary for the estimation of region-dependent  $\text{LNO}_x$  PEs.

**Table R2 .** Uncertainties for the estimation of  $\text{LNO}_x$  production efficiency.

| Type                           | Uncertainty (%) |
|--------------------------------|-----------------|
| $\text{LNO}_x$ lifetime        | 27 %            |
| Lightning detection efficiency | 27 %            |
| $\text{NO}/\text{NO}_2$ ratio  | 30 %            |
| $\text{LNO}$ profile           | 26 %            |
| Stratospheric vertical column  | 7 %             |
| Others                         | 10 %            |
| Net                            | 56 %            |

(4) Fig. 6  $a_{ii} - c_{ii}$  and  $a_{iv} - c_{iv}$  show a decrease in  $\text{AMF}_{\text{LNO}_x}$  when  $\text{LNO}_x$  is enhanced at higher altitudes, in contrast to the behavior of  $\text{AMF}_{\text{trop}}$ , which is consistent with Fig. 7. Please include some words qualitatively discussing the behavior of  $\text{AMF}_{\text{LNO}_x}$ .

Added.

While the  $\text{AMF}_{\text{LNO}_x}$  **decreases by 5 %–40 %** for both cases, the changes of  $\text{AMF}_{\text{trop}}$  ( $\Delta\text{AMF}_{\text{trop}}$ ) are regionally specific and can be classified by the lightning activity: fresh lightning (MT  $\Delta\text{AMF}_{\text{trop}} < -20$  %), downwind of fresh lightning (MT  $\Delta\text{AMF}_{\text{trop}} > 20$  %), and aged lightning (UT  $\Delta\text{AMF}_{\text{trop}} > 20$  %).

(5) In Figure 5f, why wasn't the northern part of the region included in the  $\text{LNO}_x$  analysis (section 5.2)? There appear to be adequate flashes there, along with  $\text{LNO}_x$  and a high cloud fraction. The southern/southeastern regions include areas of low cloud fraction that could potentially contaminate the measurements with anthropogenic  $\text{NO}_2$ . Also, if winds are from the WNW, shouldn't the flash-counting window be displaced WNW of the  $\text{LNO}_x$  window?

We had decided to include both parts in the analysis at the first time. However, there are many missing data in the northern convection. As replied in (3), the anthropogenic  $\text{NO}_2$  has been included in the retrieval algorithm, which has also been applied in Zhang et al. (2020). We have fixed a bug of deriving the  $\text{VCD}_{\text{LNO}_x}$  and modified the selected region with clearer statements. The figure has been re-plotted and the  $\text{LNO}_x$  PE is estimated as  $60 \pm 33$  mol  $\text{NO}_x$  per flash.

As the dissipated convection produced enough lightning and the UT winds within the storm were blowing from the west-northwest to east-southeast (Fig. R3a), the pattern of  $\text{VCD}_{\text{LNO}_x}$  can still be clearly identified (dashed rectangle in Fig. R3). Fortunately, there is a low  $\text{VCD}_{\text{LNO}_x}$  strip separating the northern and southern convection. With the careful selection, the  $\text{LNO}_x$  PE is estimated as 60 mol  $\text{NO}_x$  per flash. Although there are a few lightning flashes related to the  $\text{VCD}_{\text{LNO}_x}$  is outside of the region selection, it only affects the  $\text{LNO}_x$  PE by  $\approx 2$  mol, which is within the uncertainty discussed below.

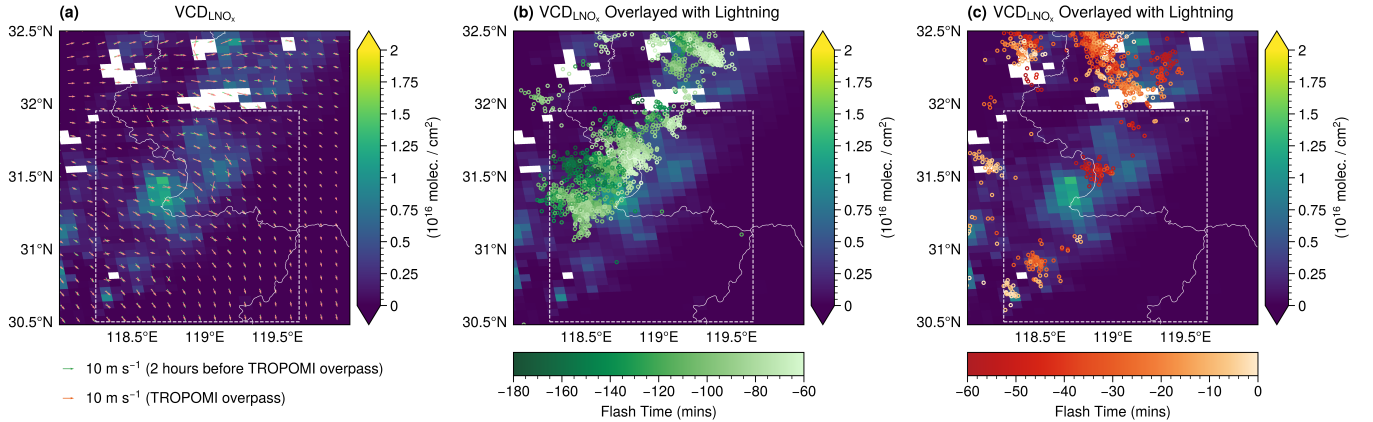

**Figure R3 .** The background is the distribution of  $\text{LNO}_x$  vertical column densities ( $\text{VCD}_{\text{LNO}_x}$ ). The white rectangles are manually selected regions for the  $\text{LNO}_x$  PE estimation. The overlaid wind arrows in (a) are the 500 hPa horizontal wind simulated by WRF-Chem. The lightning dots in (b) and (c) are the flashes whose color depends on the occurring time relative to the TROPOMI overpass time.

## Specific comments and technical corrections

1) Page 2, line 49: "We apply new a priori NO<sub>2</sub>..."

Thanks, fixed.

We apply **new a priori NO<sub>2</sub>** profiles into the retrieval algorithm to explore the sensitivity of AMFs to LNO<sub>x</sub>.

2) Page 3, line 57: "...near the air mass convection that developed on 25..."

Fixed.

Three Institute of Atmospheric Physics (IAP) ozonesondes had been launched near the air mass convection **that** developed on 25 July 2019.

3) Page 3, line 64: "...the observed difference of more than 65%."

Fixed.

therefore the daily variation cannot explain the observed difference of **more than 65 %**.

4) Page 5, line 84: "...with a constant IC/CG ratio of 3:1 based on Wu et al..."

Fixed.

Because the IC DE of all these lightning data is low in China, we conservatively used the merged CG data **with a constant IC/CG ratio of 3:1 based on ...**

5) Page 5, lines 81 – 85: Please add some detail on how the 3 datasets were merged. Was CNLDN used to estimate a DE for ENTLN and WWLLN?

Added.

The detection efficiency (DE) of cloud-to-ground (CG) flashes is about 90 % for the CNLDN data in Jiangsu province (Li et al., 2017) while ENTLN and WWLLN detect both intro-cloud (IC) and CG flashes with specific detection frequency (1 Hz–12 MHz for ENTLN and 3–30 kHz for WWLLN). In the ENTLN data, groups of pulses are classified as a flash if they are within 700 ms and 10 km. Both strokes and lightning flashes composed of one or more strokes are included in the preprocessed data obtained from the ENTLN. The detailed processing algorithm of the WWLLN is given by Rodger et al. (2004). The WWLLN strokes and pulses are combined with ENTLN into one dataset (ENGLN) within 10 km and 0.7 s as mentioned in Virts and Goodman (2020). **To increase the lightning data coverage in our study, the CG flashes of ENGLN and CNLDN datasets are combined using spatial and temporal clustering criteria of 10 km and 0.5 s (Zhao et al., 2020). Although CG detection efficiency of ENGLN is not known for this region due to a lack of validation data, merging these three datasets should provide a sufficiently high CG flash detection efficiency for this analysis. Because the IC DE of all these lightning data is low in China, we conservatively use the merged CG data with a constant IC/CG ratio of 3:1 based on Wu et al. (2016) and Bandholnopparat et al. (2020). IC data will become more accurate if more Chinese total lightning networks, such as Beijing Lightning Network (BLNET; Srivastava et al., 2017), are available.**

6) Page 6, line 105: Please add a similar equation for  $AMF_{trop}$ , since it is used in section 5.1.

Added.

We replaced the tropospheric AMF ( $AMF_{trop}$ ) with a new AMF called AMF for  $LNO_x$  ( $AMF_{LNO_x}$ ) to derive the tropospheric  $LNO_x$  vertical column density ( $VCD_{LNO_x}$ ). The concept of  $AMF_{LNO_x}$  inherits from the  $AMF_{trop}$  derived by a function of several parameters (solar zenith angle, viewing zenith angle, relative azimuth angle, surface albedo, surface pressure, cloud fraction, cloud height, and a priori trace gas profile). Briefly, the numerator is the modeled tropospheric  $NO_2$  slant column density ( $SCD_{tropNO_2}$ ) and the denominator is the modeled VCD ( $VCD_{NO_2}$  or  $VCD_{LNO_x}$ ). In detail, these two AMFs can be calculated as:

$$AMF_{Trop} = \frac{(1 - f_{effNO_2}) \int_{p_{surf}}^{p_{tp}} w_{clear}(p) NO_2(p) dp + f_{effNO_2} \int_{p_{cloud}}^{p_{tp}} w_{cloudy}(p) NO_2(p) dp}{\int_{p_{surf}}^{p_{tp}} NO_2(p) dp}$$
$$AMF_{LNO_x} = \frac{(1 - f_{effNO_2}) \int_{p_{surf}}^{p_{tp}} w_{clear}(p) NO_2(p) dp + f_{effNO_2} \int_{p_{cloud}}^{p_{tp}} w_{cloudy}(p) NO_2(p) dp}{\int_{p_{surf}}^{p_{tp}} LNO_x(p) dp}$$

7) Page 7, line 161: "The squall line on 1 September, 2020 was born..."

Sorry for the wrong date. Fixed.

The squall line on **1 September, 2020** was born in the ...

8) Page 10, Fig. 4 caption: "The vertical distributions of the O3 net production rate and tendency..."

Fixed.

The vertical distributions of the O<sub>3</sub> **net production rate and tendency** due to ...

9) Page 10, line 198: Regarding "...less significant (< 1%)..." From Table 1, I estimate that for the 2020 case, changes in chemistry affect net O3 production by 0.3% and ≈3% during the life cycle and convective period, resp.

The changes are  $(16.9-17.1)/17.1 = 1\%$  and  $(31.9-32.0)/32.0 = 0.3\%$  for the convective period and life cycle, resp (Table R1).

The decreased chemistry contribution is less significant ( $\leq 1\%$ ) for the 2020 case which has a smaller lightning density near the station.

10) P10, line 201: "...can certainly enhance the downwind ozone production on the scale of days..."

Fixed.

Note that the  $LNO_x$  can certainly enhance the downwind ozone production **on the scale of days** (Pickering et al., 1996; DeCaria et al., 2005).

11) Page 12, Fig. 5 caption: Please state white grid cells are for missing TROPOMI data (no2\_scd\_flag > 0 ?).

We have modified the caption and added the definition of no2\_scd\_flag in the Appendix A.

**Fig caption**

... These white grid cells stand for missing TROPOMI data (`no2_scd_flag`  $\neq$  0), as defined in Appendix A.

**Appendix A: Flag definitions used in this study**

The `no2_scd_flag` is introduced to make usage of the NO<sub>2</sub> slant column (SCD) data easier, by gathering information from a few variables into one flag (Table R3). This flag can thus be used for filtering, though with care as it probably does not cover all possible situation. Here " $\delta$ " refers to the SCD error (in mol/m<sup>2</sup>) and "pqf" stands for processing quality flag.

**Table R3** . Definition of `no2_scd_flag`.

| Value     | Meaning                                                                                |
|-----------|----------------------------------------------------------------------------------------|
| -1        | no SCD value due to saturation limit exceeded, i.e. pqf=54                             |
| 0         | SCD with $\delta < 3.3 \times 10^{-5}$ & no error reported                             |
| 1         | SCD with $\delta < 3.3 \times 10^{-5}$ & error reported: pqf=55                        |
| 2         | SCD with $\delta < 3.3 \times 10^{-5}$ & other error reported, e.g. pqf=41             |
| 3         | SCD with $\delta \geq 3.3 \times 10^{-5}$ & no error reported                          |
| 4         | SCD with $\delta \geq 3.3 \times 10^{-5}$ & error reported: pqf=55                     |
| 5         | SCD with $\delta \geq 3.3 \times 10^{-5}$ & other error reported, e.g. pqf=41          |
| FillValue | no SCD due other error (prior to the Differential Optical Absorption Spectroscopy fit) |

12) Page 13, lines 218-219: "... middle troposphere (MT, 800 hPa to 400 hPa), upper troposphere (UT 400 hPa to 150 hPa)... "

Added the abbreviation of upper troposphere.

The changes in the retrieved AMFs are examined by replacing profiles in three tropospheric layers independently: middle troposphere (MT, 800 hPa to 400 hPa), upper troposphere (UT, 400 hPa to 150 hPa), and troposphere (surface to tropopause)

13) Page 13, line 220-221: "...Figure 6 shows that the AMF changes...". Also, Beirle et al. (2009) noted a decrease in sensitivity in the UT due to the NO<sub>2</sub>/NO<sub>x</sub> branching ratio.

Added.

Figure 7 shows that the **AMF** changes are mostly controlled by the LNO<sub>x</sub> in the UT layer where the detection sensitivity is high (Beirle et al., 2009; Laughner and Cohen, 2017) and the LNO<sub>x</sub> production reaches the peak (Fig. S6).

14) Page 13, line 226: "...UT  $\Delta$ AMF<sub>trop</sub> > 20 % exists in Fig. 6bi and biii,"

Fixed.

This explains why UT  $\Delta$ AMF<sub>trop</sub> > 20 % exists in Fig. 7b<sub>i</sub> and b<sub>iii</sub>,

15) Page 14, Fig 6 caption:

"...is the AMF<sub>trop</sub> with 500 mol NO per flash relative to 0 mol NO per flash"

"...is the AMF<sub>LNO<sub>x</sub></sub> with 700 mol NO per flash relative to 500 mol NO per flash"

Also, it would help to see the ovals overplotted on all figures for easier comparison.

Thanks for the suggestion. We have added ovals to the first and third row of Fig. R4, because the  $\Delta\text{AMF}_{\text{LNO}_x}$  is mostly negative and the figure is cleaner than that full of ovals.

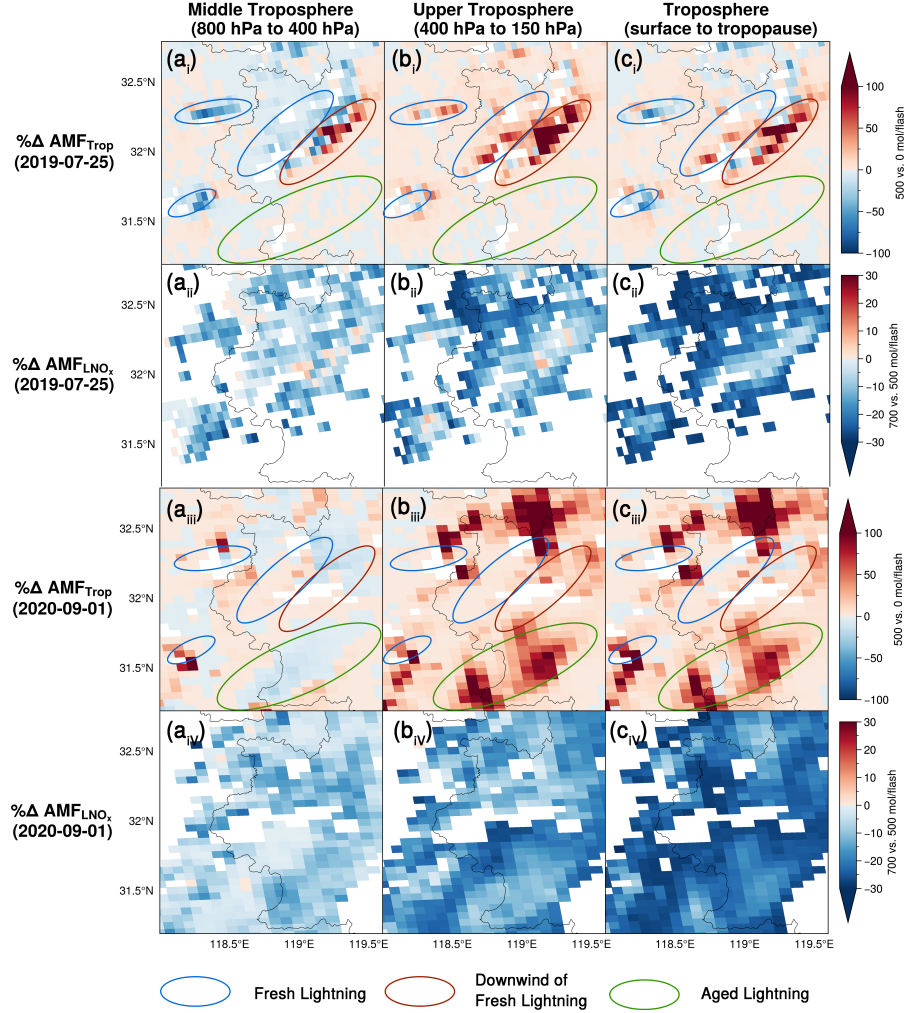

**Figure R4 .** The percent differences of AMFs by replacing the a priori  $\text{NO}_2$  profiles at three layers: middle troposphere (left), upper troposphere (middle), and troposphere (right).  $\Delta\text{AMF}_{\text{trop}}$  is the comparison of the  $\text{AMF}_{\text{trop}}$  with 500 mol NO per flash relative to 0 mol NO per flash.  $\Delta\text{AMF}_{\text{LNO}_x}$  is the comparison of the  $\text{AMF}_{\text{LNO}_x}$  with 700 mol NO per flash relative to 500 mol NO per flash. Three regions are annotated: fresh lightning (blue), downwind of fresh lightning (red), and aged lightning (green). Because of the quite large  $\text{AMF}_{\text{LNO}_x}$  values in pixels with little lightning,  $\Delta\text{AMF}_{\text{LNO}_x}$  is shown over pixels where  $0 < \text{AMF}_{\text{LNO}_x} < 10$ .

16) Page 15, Fig 7: Please label the x-axes in (b), (c) and (d).

Added (Fig. R5).

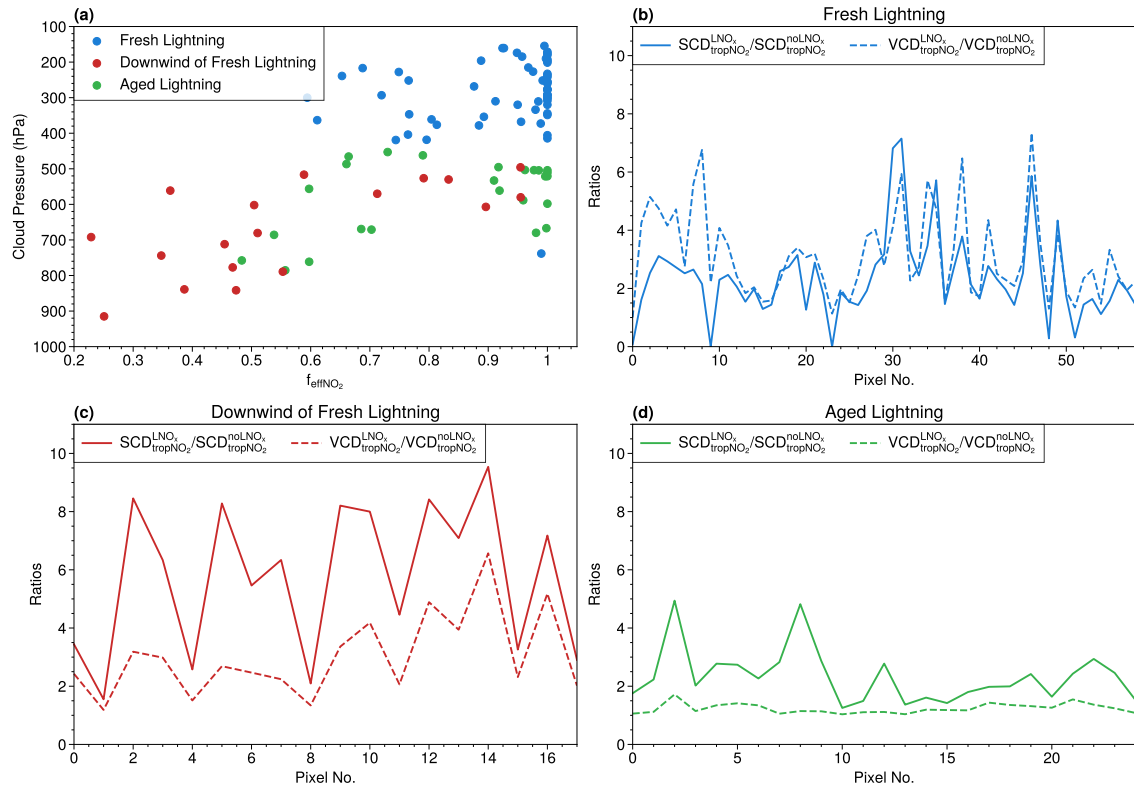

**Figure R5 .** (a) The relationship between cloud pressure and  $f_{\text{effNO}_2}$  for three regions defined in Fig. 7: fresh lightning region, downwind of fresh lightning, and aged lightning area. (b–d) The a priori  $\text{SCD}_{\text{tropNO}_2}^{\text{LNO}_x} / \text{SCD}_{\text{tropNO}_2}^{\text{noLNO}_x}$  and a priori  $\text{VCD}_{\text{tropNO}_2}^{\text{LNO}_x} / \text{VCD}_{\text{tropNO}_2}^{\text{noLNO}_x}$  of pixels in these three regions. The  $\text{LNO}_x$  superscript indicates that the a priori variable is calculated with  $\text{LNO}_x$  (500 mol NO per flash) and the  $\text{noLNO}_x$  superscript is without  $\text{LNO}_x$ .

17) Figure S1, caption: "... WRF-Chem simulations for the 2019 and 2020 cases."

Fixed.

Domain and terrain height (m) of the WRF-Chem simulations for the 2019 and 2020 cases.

18) Figure S2: The times/dates in the legend of (a) are not correct

Sorry for the misleading. Because the time resolution of WACCM is 6 hours, the time shown in the legend (Fig. R6) is different from that of ozonesonde.

19) Figure S3, caption: "... in Fig. 2 for 25 July, 2019.""

Fixed (Fig. R7).



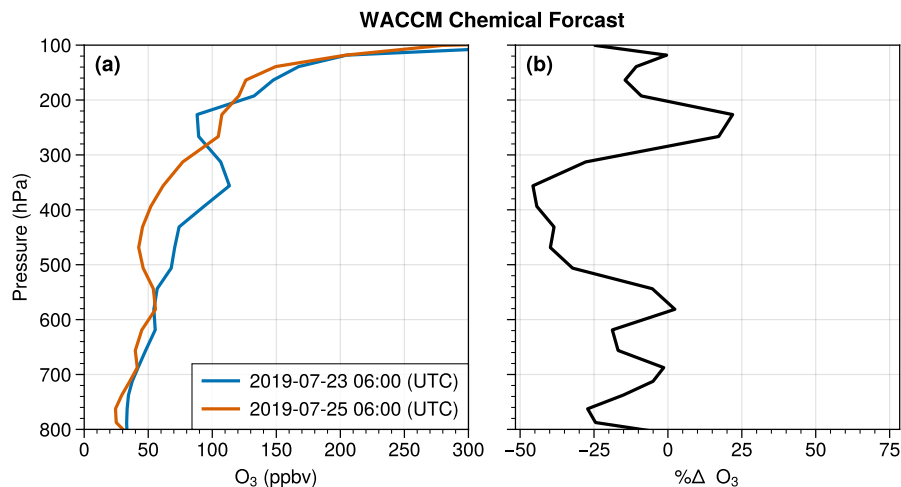

**Figure R6 .** (a) Regional mean ( $118.5^{\circ}\text{E} - 119.5^{\circ}\text{E}$ ,  $31.5^{\circ}\text{N} - 32.5^{\circ}\text{N}$ ) preconvection (blue) and postconvection (orange)  $O_3$  profiles from the 6-hour WACCM forecasts. (b) The percent difference of  $O_3$  profiles in (a).

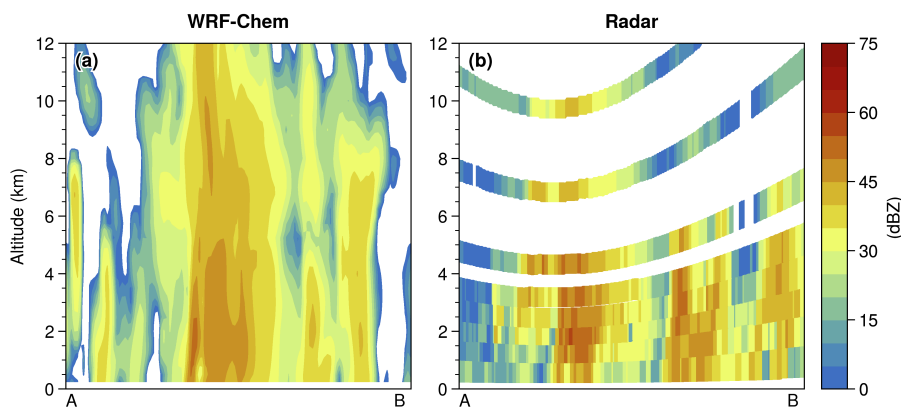

**Figure R7 .** Vertical cross sections of (a) WRF-Chem simulated and (b) observed radar reflectivity fields along the transect lines (AB) in Fig. 2 for 25 July, 2019.

## References

- Allen, D. J., Pickering, K. E., Bucsela, E., Krotkov, N., and Holzworth, R.: Lightning NO<sub>x</sub> Production in the Tropics as Determined Using OMI NO<sub>2</sub> Retrievals and WLLN Stroke Data, *J. Geophys. Res. Atmos.*, 124, 13 498–13 518, <https://doi.org/10.1029/2018JD029824>, 2019.
- Allen, D. J., Pickering, K. E., Bucsela, E., Geffen, J. V., Lapierre, J., Koshak, W., and Eskes, H.: Observations of Lightning NO<sub>x</sub> Production from TROPOMI Case Studies over the United States, *J. Geophys. Res. Atmos.*, 126, e2020JD034 174, <https://doi.org/10.1029/2020JD034174>, 2021.
- Bandholnopparat, K., Sato, M., Adachi, T., Ushio, T., and Takahashi, Y.: Estimation of the IC to CG Ratio Using JEM-GLIMS and Ground-Based Lightning Network Data, *J. Geophys. Res. Atmos.*, 125, e2019JD032 195, <https://doi.org/10.1029/2019jd032195>, 2020.
- Beirle, S., Salzmann, M., Lawrence, M. G., and Wagner, T.: Sensitivity of Satellite Observations for Freshly Produced Lightning NO<sub>x</sub>, *Atmos. Chem. Phys.*, 9, 1077–1094, <https://doi.org/10.5194/acp-9-1077-2009>, 2009.
- Bozem, H., Fischer, H., Gurk, C., Schiller, C. L., Parchatka, U., Koenigstedt, R., Stickler, A., Martinez, M., Harder, H., Kubistin, D., Williams, J., Eerdeken, G., and Lelieveld, J.: Influence of Corona Discharge on the Ozone Budget in the Tropical Free Troposphere: A Case Study of Deep Convection during GABRIEL, *Atmos. Chem. Phys.*, 14, 8917–8931, <https://doi.org/10.5194/acp-14-8917-2014>, 2014.
- Bucsela, E., Pickering, K. E., Allen, D., Holzworth, R., and Krotkov, N.: Midlatitude Lightning NO<sub>x</sub> Production Efficiency Inferred from OMI and WLLN Data, *J. Geophys. Res. Atmos.*, 124, 13 475–13 497, <https://doi.org/10.1029/2019jd030561>, 2019.
- DeCaria, A. J., Pickering, K. E., Stenchikov, G. L., and Ott, L. E.: Lightning-Generated NO<sub>x</sub> and Its Impact on Tropospheric Ozone Production: A Three-Dimensional Modeling Study of a Stratosphere-Troposphere Experiment: Radiation, Aerosols and Ozone (STRAO-A) Thunderstorm, *J. Geophys. Res. Atmos.*, 110, <https://doi.org/10.1029/2004JD005556>, 2005.
- Laughner, J. L. and Cohen, R. C.: Quantification of the Effect of Modeled Lightning NO<sub>2</sub> on UV–Visible Air Mass Factors, *Atmos. Meas. Tech.*, 10, 4403–4419, <https://doi.org/10.5194/amt-10-4403-2017>, 2017.
- Li, F., Wu, L., and Li, Y.: Lightning Data Analysis of the CMA Network in China, *Atmos. Meas. Tech. Discuss.*, pp. 1–22, <https://doi.org/10.5194/amt-2016-380>, 2017.
- Ott, L. E., Pickering, K. E., Stenchikov, G. L., Huntrieser, H., and Schumann, U.: Effects of Lightning NO<sub>x</sub> Production during the 21 July European Lightning Nitrogen Oxides Project Storm Studied with a Three-Dimensional Cloud-Scale Chemical Transport Model, *J. Geophys. Res. Atmos.*, 112, 61, <https://doi.org/10.1029/2006JD007365>, 2007.
- Pickering, K. E., Thompson, A. M., Dickerson, R. R., Luke, W. T., McNamara, D. P., Greenberg, J. P., and Zimmerman, P. R.: Model Calculations of Tropospheric Ozone Production Potential Following Observed Convective Events, *J. Geophys. Res.*, 95, 14 049, <https://doi.org/10.1029/JD095iD09p14049>, 1990.
- Pickering, K. E., Thompson, A. M., Wang, Y., Tao, W.-K., McNamara, D. P., Kirchhoff, V. W. J. H., Heikes, B. G., Sachse, G. W., Bradshaw, J. D., Gregory, G. L., and Blake, D. R.: Convective Transport of Biomass Burning Emissions over Brazil during TRACE A, *J. Geophys. Res.*, 101, 23 993–24 012, <https://doi.org/10.1029/96JD00346>, 1996.
- Pickering, K. E., Bucsela, E., Allen, D., Ring, A., Holzworth, R., and Krotkov, N.: Estimates of Lightning NO<sub>x</sub> Production Based on OMI NO<sub>2</sub> Observations over the Gulf of Mexico, *J. Geophys. Res. Atmos.*, 121, 8668–8691, <https://doi.org/10.1002/2015JD024179>, 2016.
- Rodger, C. J., Brundell, J. B., Dowden, R. L., and Thomson, N. R.: Location Accuracy of Long Distance VLF Lightning Location network, *Ann. Geophys.*, 22, 747–758, <https://doi.org/10.5194/angeo-22-747-2004>, 2004.
- Srivastava, A., Tian, Y., Qie, X., Wang, D., Sun, Z., Yuan, S., Wang, Y., Chen, Z., Xu, W., Zhang, H., Jiang, R., and Su, D.: Performance Assessment of Beijing Lightning Network (BLNET) and Comparison with Other Lightning Location Networks across Beijing, *Atmospheric Research*, 197, 76–83, <https://doi.org/10.1016/j.atmosres.2017.06.026>, 2017.
- van Geffen, J., Eskes, H., Compornolle, S., Pinardi, G., Verhoelst, T., Lambert, J.-C., Sneep, M., ter Linden, M., Ludewig, A., Boersma, K. F., and Veefkind, J. P.: Sentinel-5P TROPOMI NO<sub>2</sub> Retrieval: Impact of Version v2.2 Improvements and Comparisons with OMI and Ground-Based Data, *Atmospheric Measurement Techniques Discussions*, pp. 1–37, <https://doi.org/10.5194/amt-2021-329>, 2021.
- Virts, K. S. and Goodman, S. J.: Prolific Lightning and Thunderstorm Initiation over the Lake Victoria Basin in East Africa, *Mon. Wea. Rev.*, 148, 1971–1985, <https://doi.org/10.1175/MWR-D-19-0260.1>, 2020.
- Wu, F., Cui, X., Zhang, D.-L., Liu, D., and Zheng, D.: SAFIR-3000 Lightning Statistics over the Beijing Metropolitan Region during 2005–07, *J. Appl. Meteorol. Climatol.*, 55, 2613–2633, <https://doi.org/10.1175/jamc-d-16-0030.1>, 2016.
- Zhang, X., Yin, Y., van der A, R., Lapierre, J. L., Chen, Q., Kuang, X., Yan, S., Chen, J., He, C., and Shi, R.: Estimates of Lightning NO<sub>x</sub> Production Based on High-Resolution OMI NO<sub>2</sub> Retrievals over the Continental US, *Atmos. Meas. Tech.*, 13, 1709–1734, <https://doi.org/10.5194/amt-13-1709-2020>, 2020.
- Zhao, P., Li, Z., Xiao, H., Wu, F., Zheng, Y., Cribb, M. C., Jin, X., and Zhou, Y.: Distinct Aerosol Effects on Cloud-to-Ground Lightning in the Plateau and Basin Regions of Sichuan, Southwest China, *Atmos. Chem. Phys.*, 20, 13 379–13 397, <https://doi.org/10.5194/acp-20-13379-2020>, 2020.
